# Supplementary material for: Oculomotor atypicalities in motor neurone disease: a systematic review
Source: Front Neurosci. 2024 Jun 26;18:1399923. doi: 10.3389/fnins.2024.1399923 (PMC11233471; doi:10.3389/fnins.2024.1399923)
Supplement: Supplementary file 1 [file Table_1.XLSX]

## Sheet: Sheet1
Table S1.	Data Extraction Table
Authors	Participant Group Studied, n (of Which Females)	Participant Age (Mean(SD))	Diagnostic Criteria	MND Clinical Phenotype Included	MND Age at Onset (Years (M(SD))	MND Duration, years (M(SD)	Site of Onset (n)	MND Severity (M(SD))	MND Progression Rate M(SD))	Cognitive Tests, Group: Score (M(SD))	Paradigm	Eye Tracking Device	Main Results
Sharma et al. [38]	ALS:31 PLS:5 Controls:26	Not reported	Not reported	ALS and PLS	Not reported	Not reported	Not reported	Not reported	Not reported	Not reported	Prosaccade task Antisaccade task	Eyelink	•No significant differences in prosaccade task performance between any groups. •Antisaccade latency and error rates were markedly increased in both ALS and PLS patient groups compared to controls (p<0.001), and error rates in the PLS group were increased compared to the ALS group (p<0.05).
Proudfoot et al. [39]	ALS: 61 (3) PLS: 7 (5) Controls: 39 (23)	ALS: 60.5 (10) PLS: 65.3 (10.5) Controls: 57.1 (12.3)	Revised El Escorial criteria	ALS and PLS	Not reported	In months ALS: 38.6 (31) PLS: 181.3 (101)	ALS: Limb (49) Bulbar (10) Trunk (1) Cognitive (1) PLS: Limb (6) Bulbar (1)	ALSFRS-R ALS: 33.5 (6.5) PLS: 30.9 (5.8)	dASLFRS (48-ALSFRS/months): ALS: 0.51 (0.57) PLS: 0.12 (0.06)	Addenbrooke Cognitive Examination-Revised ALS: 92.4 (6.9) PLS: 87.6 (9.6) Control: 96.5 (4.5)	Prosaccade Antisaccade	Eyelink 1000	• Pro-saccade performance did not significantly differ between ALS patients, PLS patients or healthy controls. • ALS and PLS patients had increased antisaccade error rate ( p = 0.001) and latency ( p= 0.001) compared to controls. • Post hoc testing indicated that PLS patients made significantly more errors and produced antisaccades of longer latencies than ALS patients. • Within the ALS group, an…
Guo et al. [41]	ALS: 60 (30) Controls: 30 (15)	ALS: 54.35 (10.87) Controls: 52.82 (11.33)	Revised El Escorial Criteria	ALS	52.82 (11.33)	Median in months 17.5 (Range 5-51)	Spinal (48) Bulbar (12)	ALSFRS-R : 40.00	dASLFRS (48-ALSFRS/months): 0.57 (First quartile 0.22, third quartile 0.88)	Not reported	Prosaccade Smooth pursuit	videonystagmography (VisualEyes525	• Reflexive saccade latency (p = .153) and velocity (p = .187) did not significantly differ between ALS patients and controls. 10% of patients with ALS displayed hypometric reflexive saccades however this did not reach significance (p =.173). • Reflexive saccade latency and velocity and the occurrence of hypometric saccades did not significantly differ between bulbar and spinal onset patients. • …
Yunusova et al. [49]	ALS: 17 (9) Controls: 12 (6)	ALS: 61.88 (8.92). Controls: 62.25 (7.96)	Revised El Escorial criteria	ALS	Not reported	34.41 (20.07)	Not reported	ALSFRS-R: 39.70 (20.07) ALSFRS-R Bulbar: 10.7(1.70) Upper Motor Neuron Score: 3.59 (1.54)	Not reported	Simple Reaction Time Task: ALS: Instance 1: 344.05(64.49), Instance 2: 416.55 (128.15) Control: Instance 1: 278.81 (45.55), Instance 2: 280.07 (39.69)	Antisaccade	Built in laptop camera	• ALS patients made significantly fewer correct antisaccades compared to healthy controls. • Performance on the antisaccade task was linked to volume reduction in the lateral superior and middle frontal regions and medial superior frontal regions.
Moss et al. [50]	ALS: 63 (33) Controls: 37 (23)	ALS: 60.8(16.4) Controls: 54.9	Revised El Escorial criteria	ALS	Not reported	3.6 (3.1)	Bulbar (18) Spinal (45)	ALSFRS-R: 29 (median) Forced vital capacity: 58 (27) ALSFRS-R Bulbar: 9 (median) Center for Neurologic Study Lability Scale: 10 (median)	Quotient of ALSFRS-R and duration: 6.5 (median)	Phonemic fluency ALS: 10 (median)	Prosaccade Antisaccade Smooth pursuit	Videocamera positioned 2m in front of participant	• No significant difference in the number of vertical and horizontal prosaccade errors made by ALS patients and controls. No significant differences in the number of vertical and horizontal anticipatory prosaccades (i.e. eye movement when no target provided). • No significant difference in the number of anti-saccade errors made by ALS patients compared to controls. • Saccadic intrusions into high…
Zaino et al. [51]	ALS: 18 (9) Controls: 13(8)	ALS: 67 (9) Controls: 64.4 (3.4)	Revised El Escorial Criteria	ALS	Not reported	Not reported	Spinal (12) Bulbar (6)	King’s College Staging System 1: 6 2: 4 3: 7 4:1 ALS Milano-Torino Staging System 0: 14 1: 3 2: 1 ALSFRS-R: 38 (5.7)	Not reported	ECAS: ALS: 92 (17.4) Controls: 118.00 (4.62)	Prosaccade Antisaccades Memory guided saccades	ASL-504 eye-tracker device (Applied Science Laboratories)	• Prosaccade latency significantly longer in ALS patients compared to controls. • Bulbar onset ALS patients prosaccades were of reduced speed and increased duration compared to controls and spinal onset ALS patients. Spinal onset ALS patients prosaccades were of reduced amplitude compared with the controls and bulbar onset ALS patients. • Prosaccades peak velocities inversely correlated with dise…
Gorges et al. [52]	ALS: 68 (30) Controls: 31(17)	ALS: 61 (54-70) Controls: 56 (Range 48-64)	Revised El Escorial criteria	ALS	59 (30-80) Spinal: 60, 31-80 Bulbar: 55, 30-74	13 (3-64), Spinal (13, 3-49), Bulbar (13, 5-64)	Spinal (50) Bulbar (18)	ALSFRS-: 40 (Range, 14-47) Spinal (40, 14-57) Bulbar (38, 23-45)	Not reported	ECAS: ALS: 106, Range 58–132 Spinal (106, 77-125) Bulbar (108, 58-132) Controls: NA	Prosaccade Antisaccade Memory Guided Smooth pursuit	EyeSeeCam®	•ALS patients made significantly more anticipatory prosaccades in the antisaccade task (p<0.001). • No group level differences in smooth pursuit between controls and ALS patients, although at the individual level some patients presented with frequent anticipatory saccades interrupting smooth pursuit and considerable ‘catch-up’ saccades correcting for reduced gain. • Abnormally large and frequent …
Evdokimidis et al.[53]	ALS: 51 (19) Control: 28(16)	ALS: 58.8 (10.2) Control: 57.8 (9.2)	World Federation of Neurology	ALS	Not reported	25.5 (19.7) (months)	Not reported	Appel Scale 69.2 (25.0)	Not reported	Verbal IQ (VIQ). ALS: 97.96(13) Controls: 103.12(10.56) Stroop ALS: 63.15(25.7) Controls: 78.7(23.2)	Prosaccade Antisaccade Memory Guided Saccade	IRIS, SKALAR®	•Latency of correct prosaccades and error prosaccades were significantly shorter in ALS patients compared to controls (p <.01). •Latency of error antisaccades were were significantly shorter in ALS patients compared to controls ( p <.01). But, there was no significant difference in the latency of the correct antisaccades between ALS patients and controls. •Remembered saccade latencies longer in A…
Burrell et al. [54]	ALS: 24 (9) Controls: 24 (14)	ALS: 57.0 (13.9) Controls: 59.8 (15.8)	El Escorial and Awaji criteria	ALS	Not reported	22.4 (16.3) months	Bulbar (9) Limb (15)	ALSFRS Limb:36.9 (1.4) Bulbar: 40.7 (1.9)	0.56 (0.43) ALSFRS-R points per month	Not reported	Prosaccade	Saccadometer Advanced (Ober Consulting, Poland)	•Prosaccade latency and velocity did not differ between ALS patients and controls. •Saccadometry parameters were similar across Limb ALS and Bulbar ALS groups.
Becker et al. [55]	ALS: 119 (55) Controls: 47(24)	ALS: 61.0 Controls: 61.4	Not reported	ALS	Not reported	not reported	Not reported	Not reported	Not reported	Not reported	Antisaccade Memory Guided Saccades	EyeSeeCam®	•Increased number of erroneous antisaccades and memory guided saccades.
Shaunak et al. [56]	ALS: 17(5) Controls: 11	ALS: 50.4; range, 28-69, controls: 50.5; range, 29-69	World Federation of Neurology	ALS	Not reported	24.5 months (range, 6-60 months	Bulbar (4) Limb (13)	Modified Norris Scale 27.7 (range, 8-39)	Not reported	Not reported	Prosaccade Antisaccade	Magnetic scleral search coil technique (CNC Engineering, Seattle, WA)	• Increased prosaccade (p . = 0.02) and antisaccade latency (p = 0.01) in ALS group compared to controls. • No effect of participant group on velocity of prosaccades or antisaccades. • Significantly higher error rates on antisaccade task in ALS group (p = 0.02)
Rekik et al. [57]	ALS: 62(28) Controls: 85(14)	ALS: 60.5 (11) HC: 45.27(15)	Revised El Escorial criteria and electromyographic studies	ALS	56.6 (11)	57 (60) months	Spinal (88.7%) Bulbar (11.3%)	ALSFRS-R: Median 19 (Range: 10-46)	Not reported	Mini-Mental State Examination Median 26; Range 18-30 Frontal Assessment Battery Median 15; Range 4-18 ECAS Median 74; Range 31–100.	Prosaccade Antisaccade Smooth Pursuit	Videooculographic recording (device not reported)	• Abnormalities in eye movement recordings were found in 72.6% of ALS patients. •MoreALS patients produced horizontal voluntary saccades of prolonged latency compared to controls ( P =.002) . • Smooth pursuit was abnormal in 56.5% of patients compared to 21.2% of controls (p <.001). • Altered antisaccades were observed in 24.2% of our patients compared to 0% of controls (p<.001). Antisaccade erro…
Witiuk et al. [58]	ALS: 21 (2) Controls: 12(3)	ALS: 61.6 (9.6) HC: 61.6 (10.7)	Revised El Escorial criteria	ALS	Not reported	37.3(47.1)	Bulbar (1) Upper Limb (5) Lower Limb (6)	ALS Functional Rating Scale-Revised questionnaire (ALSFRS-R; Maximum 48): 36.3 (5.6)	Not reported	Montreal Cognitive Assessment 24.8 (3.5)	Prosaccade Antisaccade	ISCAN ETL-400 camera	• ALS patients prosaccade responses were much faster than controls and many responses fell within the express saccade epoch. No significant main effect of group on saccade amplitude or saccade velocity suggesting that ALS patients did not have significantly altered saccade metrics. • ALS patients made significantly more direction errors on the antisaccade task than controls (p = 0.02). ALS patien…
Riek et al. [59]	ALS Cognitively Normal: 14 (4) ALS Cognitively Impaired: 5 ALS other: 16 (8) MCI:68 (32) AD: 24(7) bvFTD: 14(4) PSP: 8(4) Parkinson's: 43 (11) Parkinson's MCI: 43(7) Parkinson's Demenita: 14 (3) Cerebrovasucar disease: 69(23) Cerebrovasucar disease MCI: 31(12) Cerebrovasucar disease dementia: 11(3) Controls: 149 (98)	ALS Cognitively Normal: 60.9 (7.1) ALS Cognitively Impaired: ALS other: 60.0 (9.8) MCI:69.7 (8) AD: 72.1(8) bvFTD: 66.6(8.8) PSP: 70.6(5.9) Parkinson's: 66.1 (6.3) Parkinson's MCI: 68.2(6.3) Parkinson's Demenita: 69.1 (8.4) Cerebrovasucar disease: 68.5(6.3) Cerebrovasucar disease MCI: 67.6(7.4) Cerebrovasucar disease dementia: 69.0(10.1) Controls: 59.4 (11.9)	ALS: El Escorial criteria	ALS	Not reported	Not reported	Not reported	Not reported	Not reported	Not reported	Prosaccade task Antisaccade task	Eyelink 1000	•Across all 12 saccadic parameters investigated (% Prosaccade task disengagements, % Antisaccade task disengagements, % Anticipatory prosaccades, % Anticipatory antisaccades, Mean prosaccade reaction time, Mean antisaccade reaction time, % Express latency correct prosaccades, % Express latency antisaccade direction errors, % Regular latency antisaccade direction errors, prosaccade velocity, prosa…
Raveh et al. [60]	ALS: 32(13) Controls: 129	ALS: 60.75(10.36) Control:62.15(9.32)	Not reported	ALS	Not reported	All pps duration >30 months	Not reported	All pps ALSFRS-R score ≥25	Not reported	Not reported	Prosaccade task Antisaccade task Smooth Pursuit	NeuraLight	•Prosaccade mean peak velocity (degree/ms) increased among ALS patients (p = 0.04). Prosaccade gain was significantly higher in ALS patients with bulbar symptoms (mean (SD)=0.99 (0.04)) compared to patients without bulbar symptoms (0.93 (0.07), p = 0.009). •Anti-saccade error rate was significantly higher in ALS patients with bulbar symptoms compared to patients without bulbar symptoms (p = 0.04)…
Poletti et al. [61]	Discovery ALS Cohort: 635 (236) Replication Cohort: 229 (76) Cognitive Unimpaired Controls: 798 (417) AD Controls: 171 (91)	Discovery ALS Cohort: 60.8 Replication Cohort: 63.0 Cognitive Unimpaired Controls: 61.3. Alzheimer's disease Controls: 73.3	Not reported	ALS, PLS and PMA	Discovery ALS Cohort: 58.8 Replication Cohort: 60.9	Not reported	Discovery ALS Cohort: Bulbar (154) Spinal (478) Replication Cohort: Bulbar (46) Spinal (177)	Not reported	Discovery ALS Cohort: 0.88 Replication Cohort: 0.78	Discovery ALS cohort: 55 (8.8%) had an ALS-specific type of impairment, 12 (2.0%) had an ALS-nonspecific type, 32 (5.2%) showed both Replication Cohort: ECAS–Italian version (88 (39.1%) patients displayed signs of cognitive impairment Cognitive Unimpaired Controls: Not reported	Prosaccade Smooth pursuit	Bedside assessment	• Oculomotor abnormalities could be detected at bedside neurologic examination in 10.5% of the total ALS population. • Oculomotor abnormalities were more common in ALS patients compared to controls ( p <.001), but not more common in ALS patients compared to AD patients. • Smooth pursuit abnormalities observed in 6.9% of ALS patients. Smooth pursuit abnormalities were more common in ALS patients t…
Marti-Fàbregas et al. [62]	MND: 16 (8) Controls: 16 (11)	MND: 56.8 (9.9) Controls: 56.1 (10.4)	Not reported	ALS, PMA and PLS.	Not reported	32.2 (Range 5.7- 771 months)	Not reported	Appel Scale 99.1	Rate of progression (difference between the current and the previous Appel score by the number of days elapsed) 4.44 (range 0.66-18.61)	Not reported	Prosaccade Smooth pursuit	Nystar, Nicolet Audiodiagnos- tics	• Mean latency of prosaccade was prolonged in MND group compared to control group (P = 0.028). The precision and velocity prosaccades did not differ between MND patients and controls. • Smooth pursuit gain was significantly lower in the MND group compared with the control group (P = 0.036) • Prosaccade latency decreased as the time from first symptom increased (P< 0.01). But there was no correlat…
Donaghy et al. [63]	MND : 44(15) Controls : 45(29)	MND : 60 Controls : 60	El Escorial criteria	Not reported	Not reported	52 months	Spinal (30) Bulbar (14)	ALSFRS-R: 35 (Range: 18-47)	Not reported	Not reported	Prosaccade Antisaccade Smooth pursuit	Skalar Medical Iris Infra-red Light Eye-Tracker Model 6500	• No significant difference in prosaccade metrics between controls and MND patients. However, bulbar onset MND patients produced slower saccades compared to spinal onset MND patients p = 0.03 ) and controls (p = 0.05). • Antisaccade latency increased in MND patients compared to controls (P =.001). No differences between bulbar and spinal onset MND patients. • Smooth pursuit ,ean ‘velocity gain’ r…
Abel et al. [64]	MND: 9(2) Controls: 11	MND Moderate 52.8 MND Severe 58.6 Controls: 53.5	Not reported	Not reported	Not reported	4.27 (calculated by hand)	Not reported	Quantified using a score based on muscle power of the four exrematies. Mean: 3.5 (Range 2.5-4.3)	Not reported	Not reported	Smooth Pursuit	Infrared limbus tracking method	• The frequency of square wave jerks was comparable in controls (15/min (15/min) and MND patients (28/min (27/min). • MND patients and controls reacted differently in response to increases in target speed. Significant decreased in gain in MND patients but no alterations in gain in controls (p =.001) •Severely affected MND patients have significantly lower gains that rapidly decreased as stimulus …
Abel et al. [65]	MND: 17(8) Controls: 17 (13)	MND : 62 Controls: 62	Clinical criteria not reported; diagnosis confimed by presence of mixed upper and lower MND features affecting cranial and limb musuclature in the absence of sensory involvement	Not reported	Not reported	3.76 (3.17) (calculated by hand)	Not reported	Severity quantified using clinical notes and score based on muscle power of the four exrematies. Mean: 3.04 (1.10, Range 1.7-4.7)	Not reported	Not reported	Smooth Pursuit	Infrared limbus tracking method	• Smooth pursuit gain is reduced in MND patients. •Severely affected MND patients appear to have lower gains than controls at all velocities and both amplitudes except at 62.8°/s at + 5°. The moderately affected MND patients had lower gains, that resemble severely affected MND patients, than controls for the 31.4°/s at +5°. •Mean peak velocities for the control, moderate and severe groups did not…
Anagnostou et al. [66]	SMA: 15 (4) Controls: 15 (4)	SMA: Range 19-67 Controls: Range 20-68	Genetically confirmed diagnosis of SMA	SMA	Not reported	29.6 (Range 17.5-51)	Not reported	Revised Hammersmith Scale : 4 (median)	Not reported	Not reported	Prosaccade	EyeSeeCam®	• No significant differences in amplitude gain, peak velocity, duration or velocity to amplitude ratio for both right and left saccades between SMA patients and healthy controls.
Anagnostou et al. [67]	Kenedy's disease: 7 (0) Controls: 21 (0)	Kenedy's disease (spinal MND): 50.3 , range: 40–62 years Controls: 49.4	Not reported	Kenedy's disease	Not reported	Not reported	Not reported	Not reported	Not reported	Not reported	Prosaccade	IRIS, Skalar, Delft	• At a group level SBMA patients saccadic eye movement metrics did not differ compared to control reference. However, differences were observed in 2/7 patients.
Esteban et al. [68]	MND: 24(10) Controls: 19	MND: 52.9; Range 35-75 Controls: 47.3; Range 27-62	EMG and Muscle Biposy	ALS and Progressive Bulbar Palsy	Not reported	16.7; Range 3-66 Months	Not reported	Not reported	Not reported	Not reported	Prosaccade		• Atypicalitis in prosaccades were not significantly common in ALS patients. • The three cases that had a severe limitation of vertical prosaccades all had clinical evidence of severe pseudobulbar damage (2 quadriparetic).
Note.	Amyotropic Lateral Sclerosis (ALS), Primary Lateral Sclerosis (PLS), Mild Cognitive Impairment (MCI), Alzheimer's Disease (AD), Behavioural Variant Frontotemporal Dementia (bvFTD), Progressive Supranuclear Palsy (PSP), Spinal Muscular Atrophy (SMA), Progressive Muscular Atrophy (PMA),
	ALS Functional Rating Scale-Revised questionnaire (ALSFRS-R), Edinburgh Cognitive and Behavioural ALS Screen (ECAS).
